# Supplementary material
Source: PubMed Central journal article supplement (PMC3868253)
Supplement: Supp_Figure1-3.pdf [file Supp_Figure1-3.pdf]

## Supplementary Data

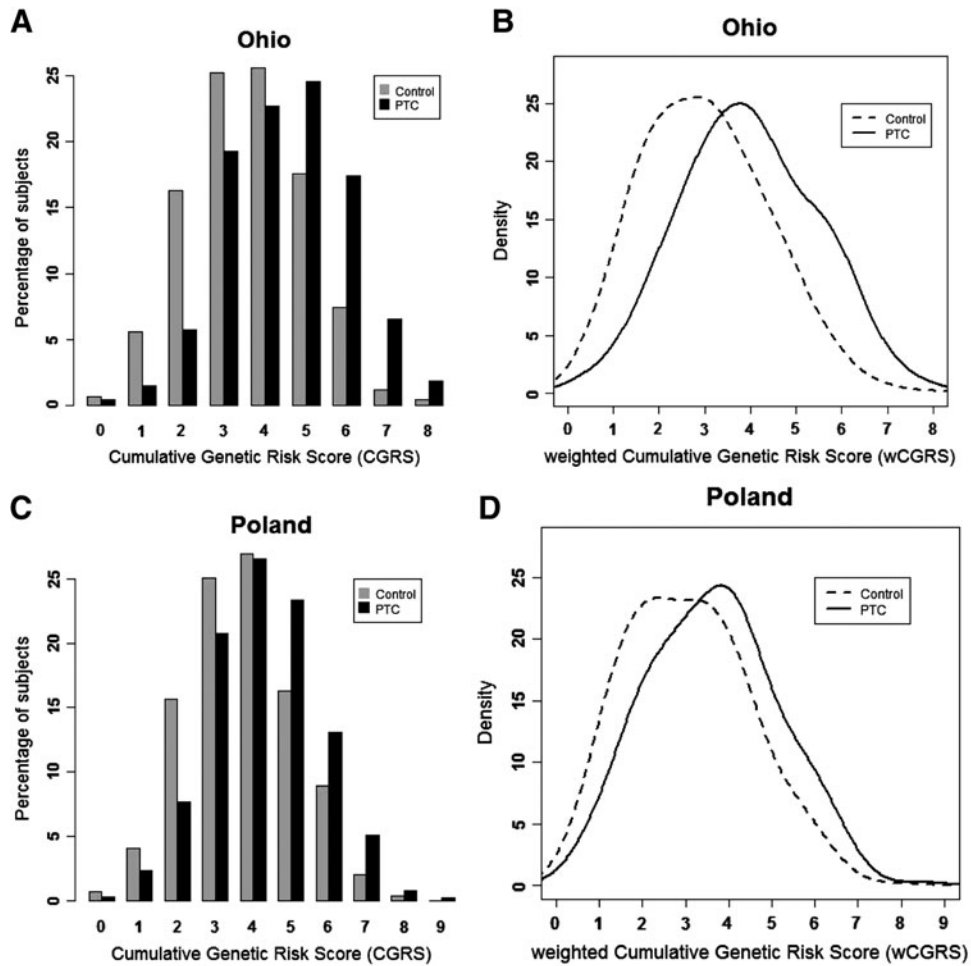

**SUPPLEMENTARY FIG. S1.** Cumulative risk scores in Ohio and Polish cohorts, after removing follicular variant papillary thyroid carcinoma (FVPTC) samples. (A, C) Distribution of number of risk alleles or cumulative genetic risk scores (CGRS) between cases and controls. (B, D) Distribution of weighted cumulative genetic risk scores (wCGRS) between cases and controls. (A, B) Ohio cohort; set of 916 controls and 488 cases without any missing genotypes were used for the analysis. (C, D) Polish cohort; set of 1663 controls and 1470 cases without any missing genotypes are used for the analysis.

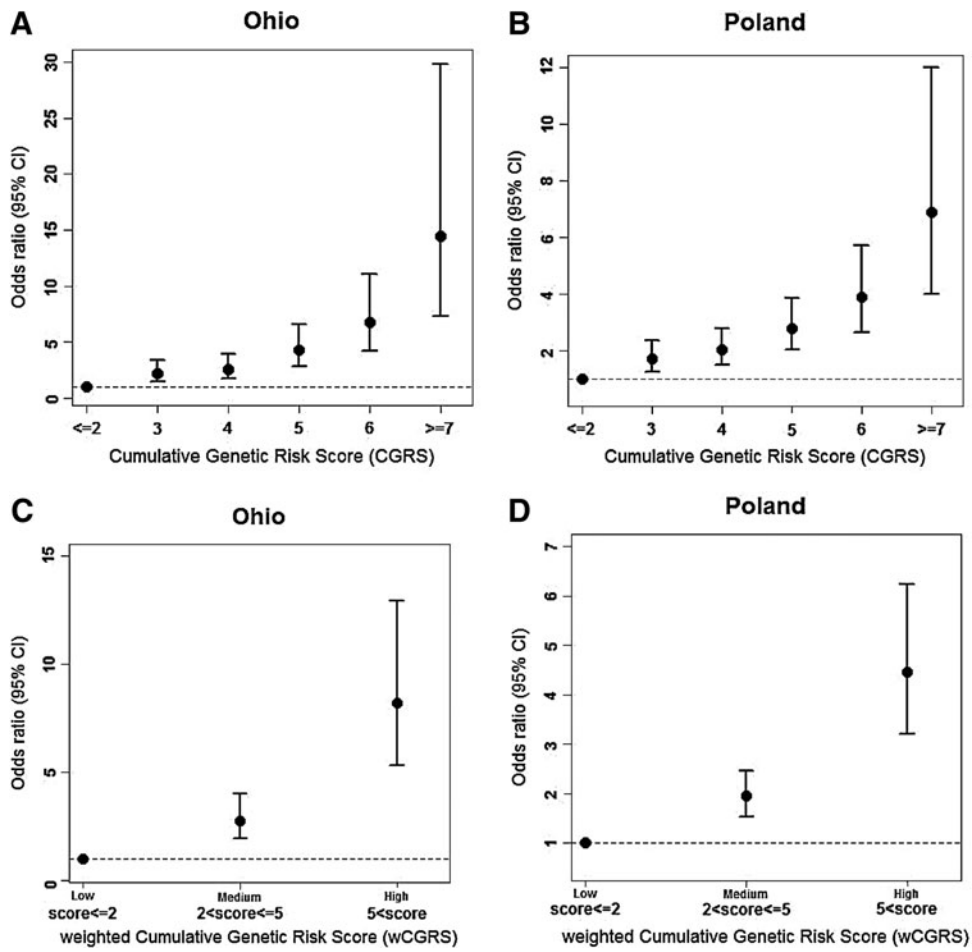

**SUPPLEMENTARY FIG. S2.** Age- and sex-adjusted odds ratios (OR) and their 95% CI for the CGRSs (A, B) and wCGRSs (C, D), after removing FVPTC samples. The groups with CGRS  $\leq 2$  and wCGRS  $\leq 2$  were set as reference groups. (A, C) Ohio cohort. (B, D) Polish cohort.

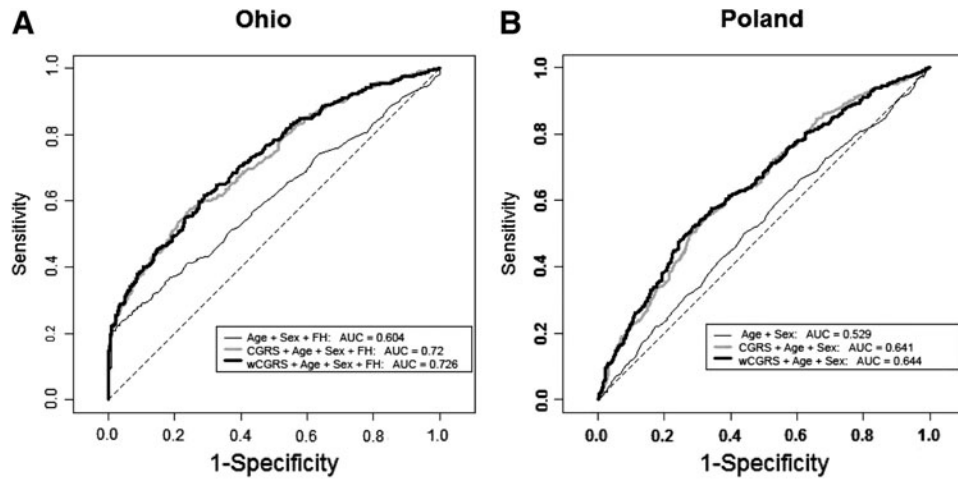

**SUPPLEMENTARY FIG. S3.** ROC curves. **(A)** ROC curves assessing the discriminative power of the unweighted and weighted cumulative genetic risk score models, after removing FVPTC samples. A random sample of age- and sex-matched cases ( $n=480$ ) and controls ( $n=480$ ) from the Ohio cohort was used for the analysis. Model was adjusted for the age, sex and family history (FH). **(B)** ROC curves assessing the discriminative power for the unweighted and weighted cumulative genetic risk score models. A random sample of age- and sex-matched cases ( $n=643$ ) and controls ( $n=643$ ) from the Polish cohort was used for the analysis. Model was adjusted for age and sex.
