# Supplementary material
Source: PubMed Central journal article supplement (PMC3868253)
Supplement: Supp_Figure4-6.pdf [file Supp_Figure4-6.pdf]

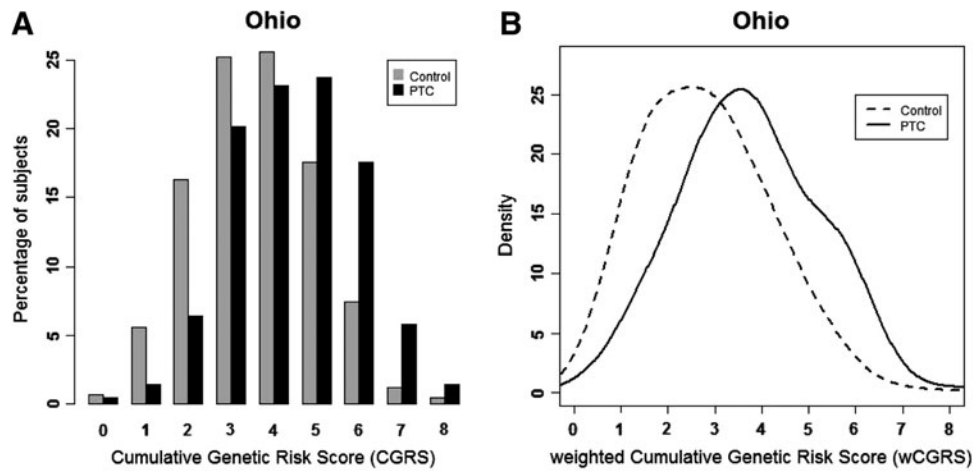

**SUPPLEMENTARY FIG. S4.** Cumulative risk scores in the Ohio cohort, after removing microPTC samples. **(A)** Distribution of number of risk alleles or CGRSs between cases and controls. **(B)** Distribution of wCGRS between cases and controls. **(A, B)** Sets of 916 controls and 501 cases without any missing genotypes were used for the analysis.

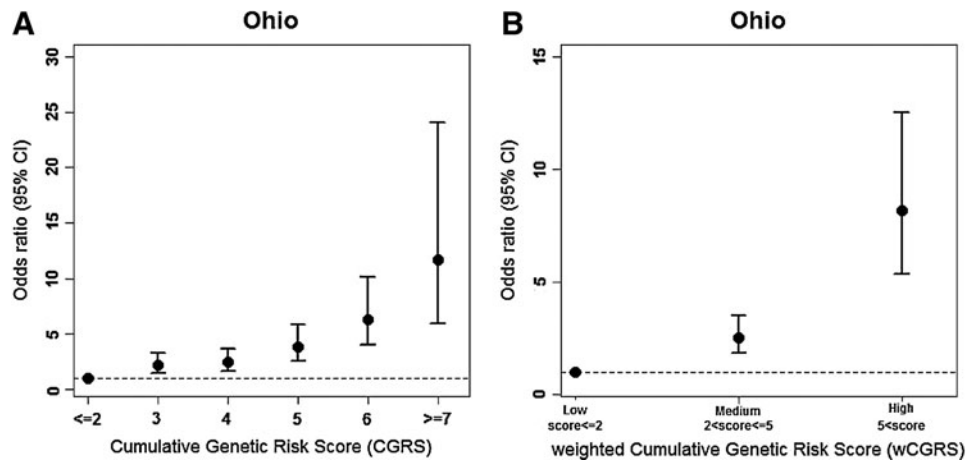

**SUPPLEMENTARY FIG. S5.** Age- and sex-adjusted odds ratios (OR) and their 95% CI for the CGRSs (A) and wCGRSs (B), in the Ohio cohort after removing microPTC samples. The groups with  $CGRS \leq 2$  and  $wCGRS \leq 2$  were set as reference groups.

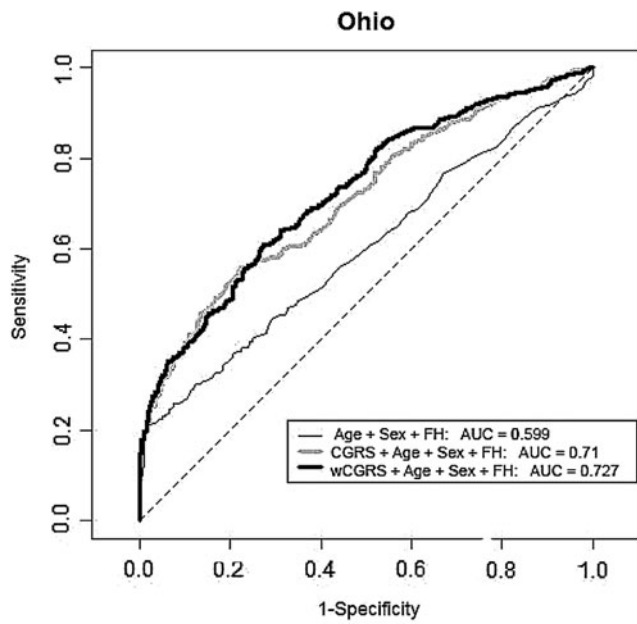

**SUPPLEMENTARY FIG. S6.** ROC curves, after removing microPTC samples. ROC curves assessing the discriminative power of the unweighted and weighted cumulative genetic risk score models. A random sample of age- and sex-matched cases ( $n=489$ ) and controls ( $n=489$ ) from the Ohio cohort was used for the analysis. Model was adjusted for age, sex, and family history (FH).
