# Supplementary material
Source: PubMed Central journal article supplement (PMC3868253)
Supplement: Supp_Table1.pdf [file Supp_Table1.pdf]

SUPPLEMENTARY TABLE S1. ASSOCIATION ANALYSIS BETWEEN SEX AND EACH SNP VARIANT

| SNP ID      | Chr. location | Risk allele | Sex | Proportions in PTC cases (Ohio) |               |                | p-value <sup>a</sup> | Proportions in controls (Ohio) |               |                | p-value <sup>a</sup> |
|-------------|---------------|-------------|-----|---------------------------------|---------------|----------------|----------------------|--------------------------------|---------------|----------------|----------------------|
|             |               |             |     | 0 Risk allele                   | 1 Risk allele | 2 Risk alleles |                      | 0 Risk allele                  | 1 Risk allele | 2 Risk alleles |                      |
| rs966423    | 2q35          | C           | F   | 0.27                            | 0.49          | 0.24           | 0.787                | 0.34                           | 0.5           | 0.16           | 0.337                |
|             |               |             | M   | 0.27                            | 0.52          | 0.22           |                      | 0.34                           | 0.47          | 0.2            |                      |
| rs944289    | 14q13         | T           | F   | 0.13                            | 0.46          | 0.41           | 0.488                | 0.17                           | 0.51          | 0.32           | 0.611                |
|             |               |             | M   | 0.16                            | 0.47          | 0.37           |                      | 0.16                           | 0.48          | 0.35           |                      |
| rs2439302   | 8p15          | G           | F   | 0.18                            | 0.52          | 0.3            | 0.871                | 0.28                           | 0.5           | 0.22           | 0.766                |
|             |               |             | M   | 0.19                            | 0.53          | 0.28           |                      | 0.3                            | 0.49          | 0.21           |                      |
| rs116909374 | 14q13         | T           | F   | 0.9                             | 0.1           | 0              | 0.249                | 0.95                           | 0.05          | 0              | 0.744                |
|             |               |             | M   | 0.87                            | 0.11          | 0.01           |                      | 0.94                           | 0.06          | 0              |                      |
| rs965513    | 9q22          | A           | F   | 0.24                            | 0.48          | 0.28           | 0.452                | 0.47                           | 0.43          | 0.11           | 0.264                |
|             |               |             | M   | 0.28                            | 0.5           | 0.22           |                      | 0.42                           | 0.46          | 0.11           |                      |

  

| SNP ID      | Chr. location | Risk allele | Sex | Proportions in PTC cases (Poland) |               |                | p-value <sup>a</sup> | Proportions in controls (Poland) |               |                | p-value <sup>a</sup> |
|-------------|---------------|-------------|-----|-----------------------------------|---------------|----------------|----------------------|----------------------------------|---------------|----------------|----------------------|
|             |               |             |     | 0 Risk allele                     | 1 Risk allele | 2 Risk alleles |                      | 0 Risk allele                    | 1 Risk allele | 2 Risk alleles |                      |
| rs966423    | 2q35          | C           | F   | 0.29                              | 0.49          | 0.22           | 0.918                | 0.32                             | 0.5           | 0.18           | 0.42                 |
|             |               |             | M   | 0.3                               | 0.49          | 0.2            |                      | 0.34                             | 0.47          | 0.19           |                      |
| rs944289    | 14q13         | T           | F   | 0.14                              | 0.46          | 0.4            | 0.651                | 0.17                             | 0.48          | 0.35           | 0.753                |
|             |               |             | M   | 0.15                              | 0.42          | 0.43           |                      | 0.17                             | 0.46          | 0.37           |                      |
| rs2439302   | 8p15          | G           | F   | 0.21                              | 0.49          | 0.3            | 0.526                | 0.26                             | 0.52          | 0.22           | 0.857                |
|             |               |             | M   | 0.19                              | 0.54          | 0.27           |                      | 0.26                             | 0.51          | 0.23           |                      |
| rs116909374 | 14q13         | T           | F   | 0.96                              | 0.03          | 0              | 0.88                 | 0.94                             | 0.06          | 0              | 0.816                |
|             |               |             | M   | 0.96                              | 0.03          | 0              |                      | 0.94                             | 0.06          | 0              |                      |
| rs965513    | 9q22          | A           | F   | 0.29                              | 0.51          | 0.2            | 0.1                  | 0.42                             | 0.48          | 0.1            | 0.05                 |
|             |               |             | M   | 0.25                              | 0.47          | 0.27           |                      | 0.41                             | 0.45          | 0.14           |                      |

<sup>a</sup>p-values were obtained by applying chi-square test or Fisher's exact test.
