# Supplementary material
Source: PubMed Central journal article supplement (PMC3868253)
Supplement: Supp_Table2.pdf [file Supp_Table2.pdf]

SUPPLEMENTARY TABLE S2. ASSOCIATION ANALYSIS RESULTS FOR FIVE SNPs IN OHIO AND POLISH COHORTS, AFTER REMOVING CASES OF FOLLICULAR VARIANT OF PAPILLARY THYROID CANCER

| <i>Cohort</i> | <i>SNP ID</i> | <i>Chr. location</i> | <i>Risk allele</i> | <i>Control/PTC (n)</i> | <i>OR<sup>a</sup></i> | <i>95% CI<sup>a</sup></i> | <i>p-value<sup>a</sup></i> | <i>Risk allele freq: PTC</i> | <i>Risk allele freq: control</i> |
|---------------|---------------|----------------------|--------------------|------------------------|-----------------------|---------------------------|----------------------------|------------------------------|----------------------------------|
| Ohio          | rs966423      | 2q35                 | C                  | (930/508)              | 1.35                  | [1.16, 1.58]              | $1.75 \times 10^{-4}$      | 0.497                        | 0.415                            |
|               | rs944289      | 14q13                | T                  | (1032/522)             | 1.28                  | [1.10, 1.51]              | $1.99 \times 10^{-3}$      | 0.638                        | 0.580                            |
|               | rs2439302     | 8p15                 | G                  | (938/508)              | 1.51                  | [1.29, 1.77]              | $4.24 \times 10^{-7}$      | 0.565                        | 0.467                            |
|               | rs116909374   | 14q13                | T                  | (932/496)              | 1.97                  | [1.31, 2.98]              | $1.11 \times 10^{-3}$      | 0.049                        | 0.026                            |
|               | rs965513      | 9q22                 | A                  | (941/572)              | 2.10                  | [1.80, 2.47]              | $< 2 \times 10^{-16}$      | 0.507                        | 0.327                            |
| Poland        | rs966423      | 2q35                 | C                  | (1899/1550)            | 1.15                  | [1.01, 1.30]              | $3.13 \times 10^{-2}$      | 0.461                        | 0.425                            |
|               | rs944289      | 14q13                | T                  | (1913/1531)            | 1.21                  | [1.06, 1.37]              | $3.55 \times 10^{-3}$      | 0.624                        | 0.595                            |
|               | rs2439302     | 8p15                 | G                  | (1901/1522)            | 1.27                  | [1.12, 1.44]              | $2.20 \times 10^{-4}$      | 0.548                        | 0.485                            |
|               | rs116909374   | 14q13                | T                  | (2010/1590)            | 1.73                  | [1.17, 2.58]              | $6.27 \times 10^{-3}$      | 0.032                        | 0.019                            |
|               | rs965513      | 9q22                 | A                  | (1911/1545)            | 1.78                  | [1.57, 2.04]              | $< 2 \times 10^{-16}$      | 0.460                        | 0.352                            |

FVPTC cases excluded: Ohio,  $n=154$ ; Poland,  $n=172$ .

<sup>a</sup>The allelic odds ratio (OR) with 95% confidence interval (95% CI) and  $p$ -values, obtained by applying multivariate logistic regression adjusting for age and sex. Derived ORs were used for the weighted risk score analysis.
