# Supplementary material
Source: PubMed Central journal article supplement (PMC3868253)
Supplement: Supp_Table3.pdf [file Supp_Table3.pdf]

SUPPLEMENTARY TABLE S3. ASSOCIATION BETWEEN THE CUMULATIVE GENETIC RISK SCORES AND PAPILLARY THYROID CANCER, AFTER REMOVING CASES OF FOLLICULAR VARIANT OF PAPILLARY THYROID CANCER

| <i>Cohort</i> | <i>CGRS</i> | <i>PTC</i> | <i>Control</i> | <i>Proportion in PTC</i> | <i>Proportion in control</i> | <i>OR<sup>a</sup></i> | <i>95% CI<sup>a</sup></i> | <i>p-value<sup>a</sup></i> |
|---------------|-------------|------------|----------------|--------------------------|------------------------------|-----------------------|---------------------------|----------------------------|
| Ohio          | ≤2          | 37         | 206            | 0.076                    | 0.225                        | Reference             |                           |                            |
|               | 3           | 94         | 231            | 0.193                    | 0.252                        | 2.19                  | [1.43, 3.40]              | 0.000365                   |
|               | 4           | 111        | 235            | 0.227                    | 0.257                        | 2.56                  | [1.69, 3.95]              | 1.22 × 10 <sup>-5</sup>    |
|               | 5           | 120        | 161            | 0.246                    | 0.176                        | 4.24                  | [2.79, 6.57]              | 3.88 × 10 <sup>-11</sup>   |
|               | 6           | 85         | 68             | 0.174                    | 0.074                        | 6.78                  | [4.22, 11.06]             | 6.21 × 10 <sup>-15</sup>   |
|               | ≥7          | 41         | 15             | 0.084                    | 0.016                        | 14.45                 | [7.34, 29.83]             | 6.42 × 10 <sup>-14</sup>   |
| Polish        | ≤2          | 151        | 339            | 0.103                    | 0.204                        | Reference             |                           |                            |
|               | 3           | 305        | 417            | 0.207                    | 0.251                        | 1.71                  | [1.26, 2.35]              | 7.22 × 10 <sup>-4</sup>    |
|               | 4           | 391        | 449            | 0.266                    | 0.270                        | 2.05                  | [1.52, 2.78]              | 3.15 × 10 <sup>-6</sup>    |
|               | 5           | 343        | 271            | 0.233                    | 0.163                        | 2.80                  | [2.03, 3.88]              | 4.67 × 10 <sup>-10</sup>   |
|               | 6           | 192        | 148            | 0.131                    | 0.089                        | 3.90                  | [2.67, 5.72]              | 2.72 × 10 <sup>-12</sup>   |
|               | ≥7          | 88         | 39             | 0.060                    | 0.023                        | 6.90                  | [4.02, 12.02]             | 4.42 × 10 <sup>-12</sup>   |

FVPTC cases excluded: ohio,  $n=154$ ; Poland,  $n=172$ .

<sup>a</sup>The odds ratio (OR) with 95% confidence interval (95% CI) and  $p$ -values, obtained by applying multivariate logistic regression adjusting for age and sex. CGRS≤2 is used as the reference group.
