# Supplementary material
Source: PubMed Central journal article supplement (PMC3868253)
Supplement: Supp_Table4.pdf [file Supp_Table4.pdf]

SUPPLEMENTARY TABLE S4. ASSOCIATION ANALYSIS RESULTS FOR FIVE SNPs IN OHIO COHORT,  
AFTER REMOVING CASES OF PAPILLARY THYROID MICROCARCINOMA

| <i>Cohort</i> | <i>SNP ID</i> | <i>Chr. location</i> | <i>Risk allele</i> | <i>Control/PTC (n)</i> | <i>OR<sup>a</sup></i> | <i>95% CI<sup>a</sup></i> | <i>p-value<sup>a</sup></i> | <i>Risk allele freq: PTC</i> | <i>Risk allele freq: control</i> |
|---------------|---------------|----------------------|--------------------|------------------------|-----------------------|---------------------------|----------------------------|------------------------------|----------------------------------|
| Ohio          | rs966423      | 2q35                 | C                  | (930/533)              | 1.26                  | [1.08, 1.47]              | $3.85 \times 10^{-3}$      | 0.476                        | 0.415                            |
|               | rs944289      | 14q13                | T                  | (1032/541)             | 1.23                  | [1.05, 1.43]              | $1.13 \times 10^{-2}$      | 0.628                        | 0.580                            |
|               | rs2439302     | 8p15                 | G                  | (938/533)              | 1.46                  | [1.25, 1.71]              | $2.61 \times 10^{-6}$      | 0.553                        | 0.467                            |
|               | rs116909374   | 14q13                | T                  | (932/517)              | 2.14                  | [1.43, 3.21]              | $2.42 \times 10^{-4}$      | 0.052                        | 0.026                            |
|               | rs965513      | 9q22                 | A                  | (941/605)              | 2.15                  | [1.84, 2.51]              | $< 2 \times 10^{-16}$      | 0.510                        | 0.327                            |

microPTC cases excluded:  $n = 118$ .

<sup>a</sup>The allelic odds ratio (OR) with 95% confidence interval (95% CI) and  $p$ -values, obtained by applying multivariate logistic regression adjusting for age and sex.
