# Supplementary material
Source: PubMed Central journal article supplement (PMC3868253)
Supplement: Supp_Table5.pdf [file Supp_Table5.pdf]

SUPPLEMENTARY TABLE S5. ASSOCIATION BETWEEN THE CUMULATIVE GENETIC RISK SCORES AND PAPILLARY THYROID CANCER, AFTER REMOVING CASES OF PAPILLARY THYROID MICROCARCINOMA

| <i>Cohort</i> | <i>CGRS</i> | <i>PTC</i> | <i>Control</i> | <i>Proportion in PTC</i> | <i>Proportion in control</i> | <i>OR<sup>a</sup></i> | <i>95% CI<sup>a</sup></i> | <i>p-value<sup>a</sup></i> |
|---------------|-------------|------------|----------------|--------------------------|------------------------------|-----------------------|---------------------------|----------------------------|
| Ohio          | ≤2          | 41         | 206            | 0.082                    | 0.225                        | Reference             |                           |                            |
|               | 3           | 101        | 231            | 0.202                    | 0.252                        | 2.12                  | [1.41, 3.24]              | 0.000372                   |
|               | 4           | 116        | 235            | 0.232                    | 0.257                        | 2.41                  | [1.62, 3.66]              | 2.25 × 10 <sup>-5</sup>    |
|               | 5           | 119        | 161            | 0.238                    | 0.176                        | 3.83                  | [2.54, 5.86]              | 2.59 × 10 <sup>-10</sup>   |
|               | 6           | 88         | 68             | 0.176                    | 0.074                        | 6.31                  | [3.98, 10.16]             | 1.18 × 10 <sup>-14</sup>   |
|               | ≥7          | 36         | 15             | 0.072                    | 0.016                        | 11.67                 | [5.9, 24.11]              | 6.21 × 10 <sup>-12</sup>   |

microPTC cases excluded:  $n = 118$ .

<sup>a</sup>The odds ratio (OR) with 95% confidence interval (95% CI) and  $p$ -values, obtained by applying multivariate logistic regression adjusting for age and sex.  $CGRS \leq 2$  is used as the reference group.
